# Supplementary material for: EARLY BUD BREAK 1 triggers bud break in peach trees by regulating hormone metabolism, the cell cycle, and cell wall modifications
Source: PubMed Central journal article supplement (PMC7475240; doi:10.1093/jxb/eraa119), 2020-03-09
Supplement: eraa119_suppl_supplementary_material.pdf [file eraa119_suppl_supplementary_material.pdf]

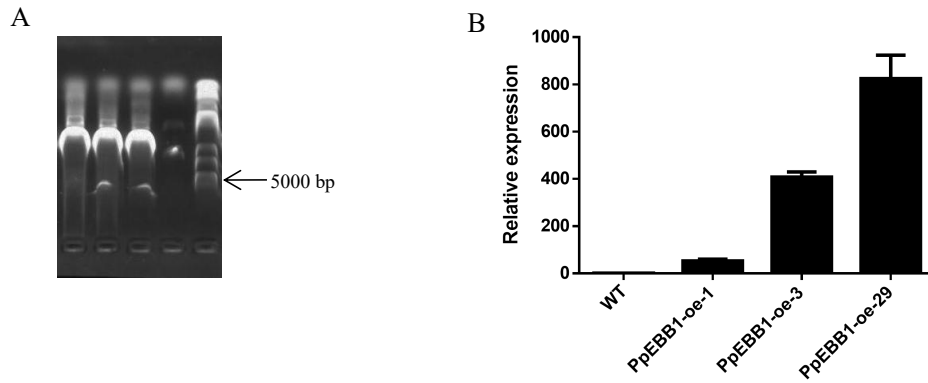

Fig.S1 Result of PCR indicated *PpEBB1* was transferred into poplar successfully, strips from left to right were *PpEBB1-oe-1*, *PpEBB1-oe-3*, *PpEBB1-oe-29*, WT, and marker respectively (A). The expression level of *PpEBB1* in WT, *PpEBB1-oe-1*, *PpEBB1-oe-3*, *PpEBB1-oe-29* lines (B).

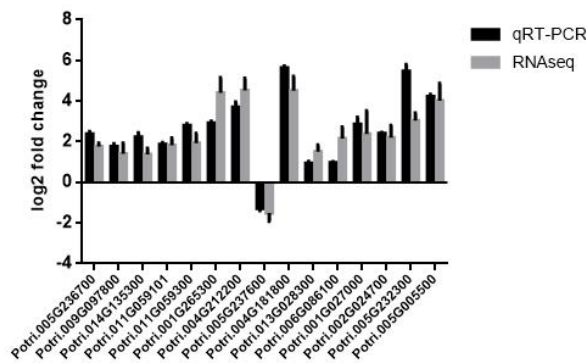

Fig. S2 Verification of RNA-seq results used qRT-PCR. The expression and tendency of different genes were similar with the result of RNA-seq, confirming that RNA-seq result was credible.

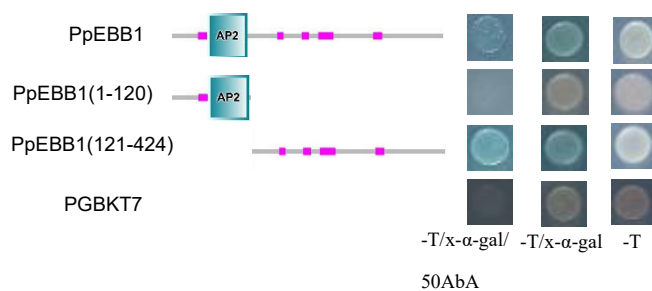

Fig.S3 Auto-activation verification of full length of *PpEBB1*, *PpEBB1* 1-120aa, and *PpEBB1* 120-424aa used Y2H assay.

Table S1. Primers used for qRT-PCR in this study.

| Abbreviated name | Forward primer | Reverse primer |
|------------------|----------------|----------------|
|------------------|----------------|----------------|

|         |                        |                        |
|---------|------------------------|------------------------|
| LOG1    | TTATTGCCTTGCCTGGTG     | CCTTCCTCTACTGCTTTGTCAA |
| LOG2    | GCACCAAAGAAAGGCAGA     | CGAACAAGGCAAGCAAAC     |
| AHP6    | CGTATCTGAAGTTGTCACCATC | CCCAGCACGGTTGTTT       |
| CKX5    | GATGAATCCACTGGCGAT     | ACAAACCCTTGGCTCTCA     |
| AHP2.1  | TTCAAGATGAGAGCAACCC    | GCTACCCTTCAACTGGTGA    |
| LOG6    | GCTGAAATGGCTCGTCAA     | GCTGGTGTGATGAATCCTTC   |
| ARR8    | CTTATCAAGTCACGGCAGTG   | CATAGCCTGTCATTCTGG     |
| ARF5    | ACCTGGACATTTCCGCAT     | GTTGTTTGTGACGGTTTGC    |
| ARF6    | GAAGGCAATCAACTCGGA     | GGCACAATAACTGAGAAGGC   |
| ARF3    | TCCTGGTTCCCACAGTTCT    | CACGAGCCTCATTAGCATT    |
| ARF3    | GCAAGTGATGAGGTGTATGC   | TGTCAGAAGCAGTTAGGGTCT  |
| ARF2    | GATTCTCTGTTCCAAAGCGA   | TGTGCTCAAACCACTCGTA    |
| CYCD3.3 | CCTCTTTGTTTGCCAAGG     | TTTCTGAAGGTGGACACTGA   |
| LOG7    | GCTGAAATGGCTCGTCAA     | ACAAACCCTTGGCTCTCA     |
| CYCD3.2 | CCATTGACTACCAGACCCA    | AGTGACGAAGAGACCGATG    |
| EXPA3   | GGAGTGAACACAGCAGCAT    | CAAAGTTAGGAGGGCAGAAA   |
| LOG5    | CACAGGAGAAACAGTTGGAGA  | TTGAGCAAACCCACAGGT     |
| EXPA8   | CCCTCCAGCACTTTGACAT    | CACTGAATGAACATCTCCTGC  |
| CKX4    | TGTCACAGACCAAGAGCGT    | CATCCGATTGAAACTGGC     |
| AHP5    | AGAGCCCTCAGTTTGTGATT   | CCTGTCCTTGTCTTGTCTT    |
| AHP2    | GCAACCCAGATTTCTGATGTT  | TATTTCTGCTCCTCGCAGT    |
| YUC6    | GGTCCAATCCAACGAGTCT    | TCCACAGCCTACAACCAAA    |
| PIN1    | CCAAGGTTCCATTACCACG    | AGGTCCCTACCATCTTCAGC   |
| PIN10   | TTATGGCAATGACCTCGG     | CAGCACTCTTTGGGTGTAGC   |
| PILS5   | GATACAGAAAGCCGTGCTATTG | TGCTCAAAGATGAATCCC     |
| PILS3   | AAGCAGCACACCATTTTCG    | AAGGTTGACCAAAGGGTAAGAG |
| PILS1   | CATCTTCATTTCCGAGCG     | CGAACCACCATCTCATCAG    |
| AUX4    | GGGTCTGTCTATGATGCCTG   | CCTTTCTGCTTCGGTATTCA   |
| AUX3    | CAGGTTGCTCAGGTTCTGTT   | CCTTTCTGCTTCGGTATTCA   |
| AUX1    | CACATTTGGGTTTGCCTG     | ACGGCTGAGTTGATAGGTC    |
| SAUR69  | ATGCGACGAGGCTGTCTTT    | GCAACGGTCTTGATTCACC    |
| SAUR61  | ATGGCAAGGAAGTGGCA      | AAGACTGCTGGCGAGTTTG    |
| SAUR6   | TGATGGCTATTTCGCTTGC    | GTAGGTCCTGAAATGAAGGTTG |
| SAUR55  | GGAGGTGGTATGTCTGGTTG   | GTCTTGATGTTCTCTTGCTTCC |
| SAUR38  | ATGTCAGCCAATCGCATA     | AAAGCCAAACTCTTCCTCG    |
| SAUR34  | AACGCAGAAGAGAACCAGC    | CACAGCCAAGTGTCTTTG     |
| SAUR22  | TAACCTGGAAGCCTTGCCA    | GTCAAACCACCCATTGGA     |
| SAUR23  | GTGAGGAGCAACAAAGGTTT   | GTGGTGGTGATACTGGGAA    |
| SAUR14  | TGATGGCTATTTCGCTTGC    | CTTGAAATGAAGGCTGGTTC   |
| GH3.6.1 | CCTGTTGATGCCTGTTATGAGT | TGTCCTTGAAATGGGTGCT    |
| GH3.9   | CGGAAATGTCTACTCCCTGTG  | GCCTTAGGACTTGATGACGG   |
| GH3.17  | GCCTGTTGATGCCTGTTATG   | TGTCCTTGAAATGGGTGCT    |
| GH3.6   | TGTGTTGAGAGTGGTTGGG    | GGAATGGTAGTGGTGTCTGC   |
| IAA33   | CGAAGGCTCTAAGGCAGAT    | AAGGTCACCAGCAAGAAGG    |

|         |                         |                          |
|---------|-------------------------|--------------------------|
| IAA16   | TTCCATCTTCCGCTGAGA      | GCAACTCTACCACCGCTTT      |
| IAA19   | GCAAACAGCACAACCGAT      | GCTCCGTCCATACTAACTTTCA   |
| IAA18   | TGTCCCATTTCTGCTACC      | GGAGGTTTATTTTCGTGACTCAG  |
| IAA12   | TTTCTCTGCTTGCGTTG       | CAGCCTTTGCTTGGTTCA       |
| IAA4    | TGATGAGCCAGAGAAACCA     | TCCCCTACTTGTGCCTTG       |
| IAA6    | TGGCACAACCTCTTGGACT     | CGATACGAACAACTGGTGG      |
| CDKB2.1 | CAACCACCACTCTTCGTGA     | GGAATGTTCTCTCCAGTTTGG    |
| CYCA1.2 | ACAGAGAATGTAGGCAAGGC    | CTATTAGAAGCAGGAGGTCCC    |
| CYCB1.1 | GTGGATTGGTTGGTTGATGT    | CATTTACCTCAGGAGCCCA      |
| CYCB1.3 | GCAATCCCAACCAGACATC     | GAAGTTCCTCCTTGTTACCAT    |
| CYCD1.1 | GCTCATCAAGACACGCTGA     | GCTACAGATAGGCAGGCTACTG   |
| CYCD2.1 | CACCATCACCATCCATCAT     | ACTCGTAGTGGGCATACACC     |
| CYCD6.1 | GATGAAGAACGCCCACTT      | GAGGTTGTGAGGATGATGG      |
| CYCP2.1 | GGTTGGAGGAGTGAGCAAT     | TCTCTGTGACGCACCATTTA     |
| EXPB3   | TAGTGGATGTGAAGCCATTG    | ACTGAGGTCAAAGTGGGTGT     |
| GH17.3  | TCATCCTCATCACTGTCCG     | CAGAAGAAGGTGGCTCAGAC     |
| GH17.4  | CACACTCATTGACAAGGTGAAG  | GGCAGGAATAAAGGGAACC      |
| GH17.5  | TCATCCTCATCACTGTCCG     | CAGAAGAAGGTGGCTCAGAC     |
| GH17.6  | AGGCTCTTACCAGCAATGC     | GCACGACTAACTCCAACAAG     |
| GH9B18  | TCTTCTCGCCCACTACTCA     | CCATCCATCACTTAGCCCT      |
| XTH28   | AGTGCTTCTATCAAGTTGCCAG  | AGTGCTGCCATTGCCATA       |
| XTH31   | ACTATCCTGGCTCCCGAAT     | TGATGGCAGCACCAAAGTA      |
| XTH9    | CAGATGATTGGGCTACACAA    | CACCACTGCTGCTACATTTT     |
| CSLD5   | TGTGGTGACTGGTTATCGTATG  | GGCGAGTAGCAAATAGAGCAT    |
| CSLE1.1 | GATGATGGAGTTTGGAGCC     | GATACAGAGGCAAGTTGACGA    |
| CSLE1.2 | CCAGATTGAAGCAACCACA     | TTGTCCATAGCCTGAGGGT      |
| CSLE1.3 | TGGGTTGGTTGAAGTTGG      | CAGACAAAGTTGAGGGATGG     |
| CEL3    | ATGAAAGCAACCAGGCAC      | TGATGGCAAAGAAGAACCTC     |
| CEL5    | GGTGGCTGTCATAGACTTCCT   | AGAGTGCTTCCTTACGGCA      |
| CALS1   | TGAAAATGGAGAGCAGACTT    | TGAGAACAAGATAGAGGCGG     |
| PLL1    | TTTCTGATGACACCCAGGC     | GGTCCCAGTTCTTAGGCTCA     |
| PLL2    | TTGCCTCCTCACCTTTAGC     | GACCCTGAAACCTCACTTGA     |
| PLL3    | GGCTACGGGCATAACTTGT     | TTACATTCCCAGACCCCTCC     |
| PLL5    | ATGGCACAACACTTCCTGG     | GCTGGTGATTTGATGCTAAGC    |
| PLL6    | TCTCATTTCACTACCACCTGC   | TCTGTGTCACCATCACCAAC     |
| PME3    | GGATGGTTTTCTCTCACGATG   | GCCCACTCTTTCATTACCTTC    |
| PME1    | GGAGGAGGCACTACAACCTTC   | TGAGAATGGACATAGAGGGTG    |
| PME32   | TCCTTGACATCGTTTCCG      | TCCATCCTTAGCCACAACA      |
| PME33   | CCGAGTCAATGAGTGATGTG    | TCTTCTCCAACGAATGTGTG     |
| PAE12   | TGCTGCTGCTGTTCTTTG      | GCTGATTTGATGAGAGTGAGG    |
| PAE11   | TTGCTCAAGGCAGAAGGAG     | CACAGGACTCAACACTCTCACA   |
| PtActin | GATTTGTCCCTCGCGCTGT     | TCGGTATAATGACCCTTGCC     |
| PpActin | GTTATTCTTCATCGGCGTCTTCG | CTTCACCATTCCAGTTCCATTGTC |
| PpEBB1  | CCAAGAAGTCAATGGACCCT    | TGTGGTTGTGGCAGCAAT       |

---

Table S2. Genes may interacted with PpEBB1 screened by Y2H.

| Gene name      | Gene description in JGI                            |
|----------------|----------------------------------------------------|
| Prupe.8G258100 | Prunus persica heat shock factor-binding protein 1 |
| Prupe.8G098000 | glucan endo-1,3-beta-glucosidase 7                 |
| Prupe.2G296500 | cytochrome P450 89A2                               |
| Prupe.4G029700 | Prunus persica protein heat-stress-associated 32   |
| Prupe.6G063300 | proliferating cell nuclear antigen                 |
| Prupe.6G231300 | SUMO-conjugating enzyme SCE1                       |
| Prupe.7G034500 | dual specificity protein phosphatase 12            |
| Prupe.5G057900 | Prunus persica expansin-like B1                    |
| Prupe.2G183100 | ubiquitin-conjugating enzyme E2-17 kDa             |
| Prupe.4G056500 | E3 ubiquitin-protein ligase                        |
